# Supplementary material
Source: publisher site journal article supplement (https://www.dovepress.com/article/401752)
Supplement: Supplementary file 1 [file get_supplementary_file.php]

Supplemental Figure 1

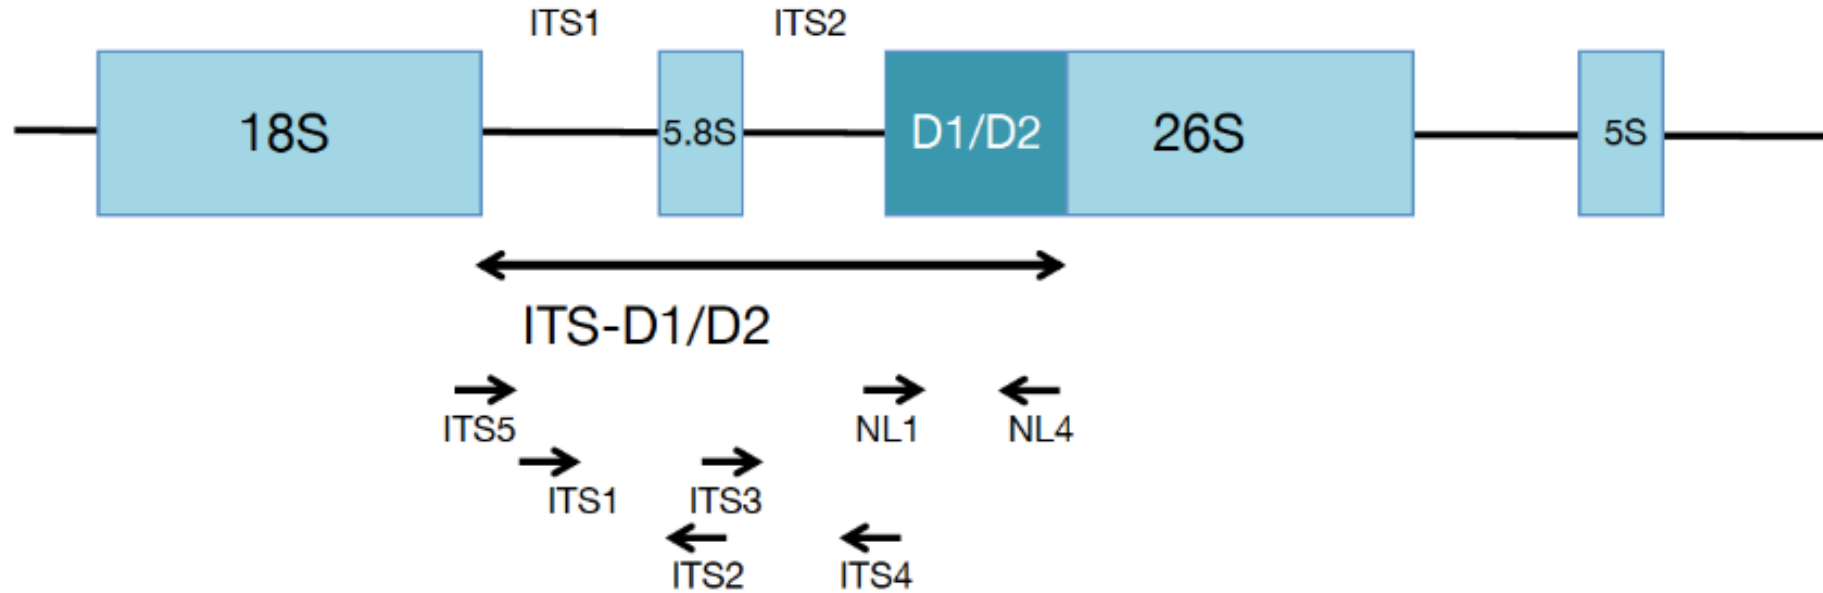

ITS5: GGAAGTAAAAGTCGTAACAAGG  
ITS1: TCCGTAGGTGAACCTGCGG  
ITS2: GCTGCGTTCTTCATCGATGC  
ITS3: GCATCGATGAAGAACGCAGC  
ITS4: TCCTCCGCTTATTGATATGC  
NL1: GCATATCAATAAGCGGAGGAAAA  
NL4: GGTCCGTGTTTCAAGACGG

## Supplemental Figure 2

ITS

| Reference description                                                                                                                                        | Score  | similarity | overlap |
|--------------------------------------------------------------------------------------------------------------------------------------------------------------|--------|------------|---------|
| CBS 144.34<br>Coccidioides immitis, Coccidioides immitis, Neotype of Coccidioides immitis G.W. Stiles, USA, nlink4056: publicly available rDNA ITS sequences | 863.81 | 99.47%     | 99.65%  |
| CBS 120936<br>Coccidioides immitis, Coccidioides immitis, Neotype of Coccidioides immitis G.W. Stiles, USA, nlink4056: publicly available rDNA ITS sequences | 813.09 | 99.44%     | 93.98%  |
| CBS 146.56<br>Coccidioides immitis, Coccidioides immitis, Hungary, nlink4056: publicly available rDNA ITS sequences                                          | 621.31 | 98.79%     | 73.27%  |
| CBS 113848<br>Coccidioides posadasii, Coccidioides posadasii, Arizona, nlink4056: publicly available rDNA ITS sequences                                      | 835.28 | 98.76%     | 100.00% |
| CBS 113847<br>Coccidioides posadasii, Coccidioides posadasii, California, nlink4056: publicly available rDNA ITS sequences                                   | 835.28 | 98.76%     | 100.00% |

D1/D2

| Reference description                                                                                                                                        | Score  | similarity | overlap |
|--------------------------------------------------------------------------------------------------------------------------------------------------------------|--------|------------|---------|
| CBS 120936<br>Coccidioides immitis, Coccidioides immitis, Neotype of Coccidioides immitis G.W. Stiles, USA, nlink4057: publicly available rDNA 26S sequences | 941.47 | 99.83%     | 100%    |
| CBS 120936<br>Coccidioides immitis, Coccidioides immitis, Neotype of Coccidioides immitis G.W. Stiles, USA, nlink4057: publicly available rDNA 26S sequences | 941.47 | 99.83%     | 100%    |
| CBS 113858<br>Coccidioides posadasii, Coccidioides posadasii, California, nlink4057: publicly available rDNA 26S sequences                                   | 941.47 | 99.83%     | 100%    |
| CBS 113855<br>Coccidioides immitis, Coccidioides immitis, California, nlink4057: publicly available rDNA 26S sequences                                       | 941.47 | 99.83%     | 100%    |
| CBS 113854<br>Coccidioides immitis, Coccidioides immitis, California, nlink4057: publicly available rDNA 26S sequences                                       | 941.47 | 99.83%     | 100%    |
